# Supplementary material for: Statin use, candidate mevalonate pathway biomarkers, and colon cancer survival in a population-based cohort study
Source: PubMed Central journal article supplement — Br J Cancer. 2017 May 18;116(12):1652–9. doi: 10.1038/bjc.2017.139 (PMC5518863; doi:10.1038/bjc.2017.139), 2017-05-18
Supplement: bjc2017139x2.pdf [file bjc2017139x2.pdf]

**Supplementary Figure 1.** HMGCR immunohistochemistry in colon cancer tissue microarrays and associated markup for digital immunoscore using QuPath image analysis software.

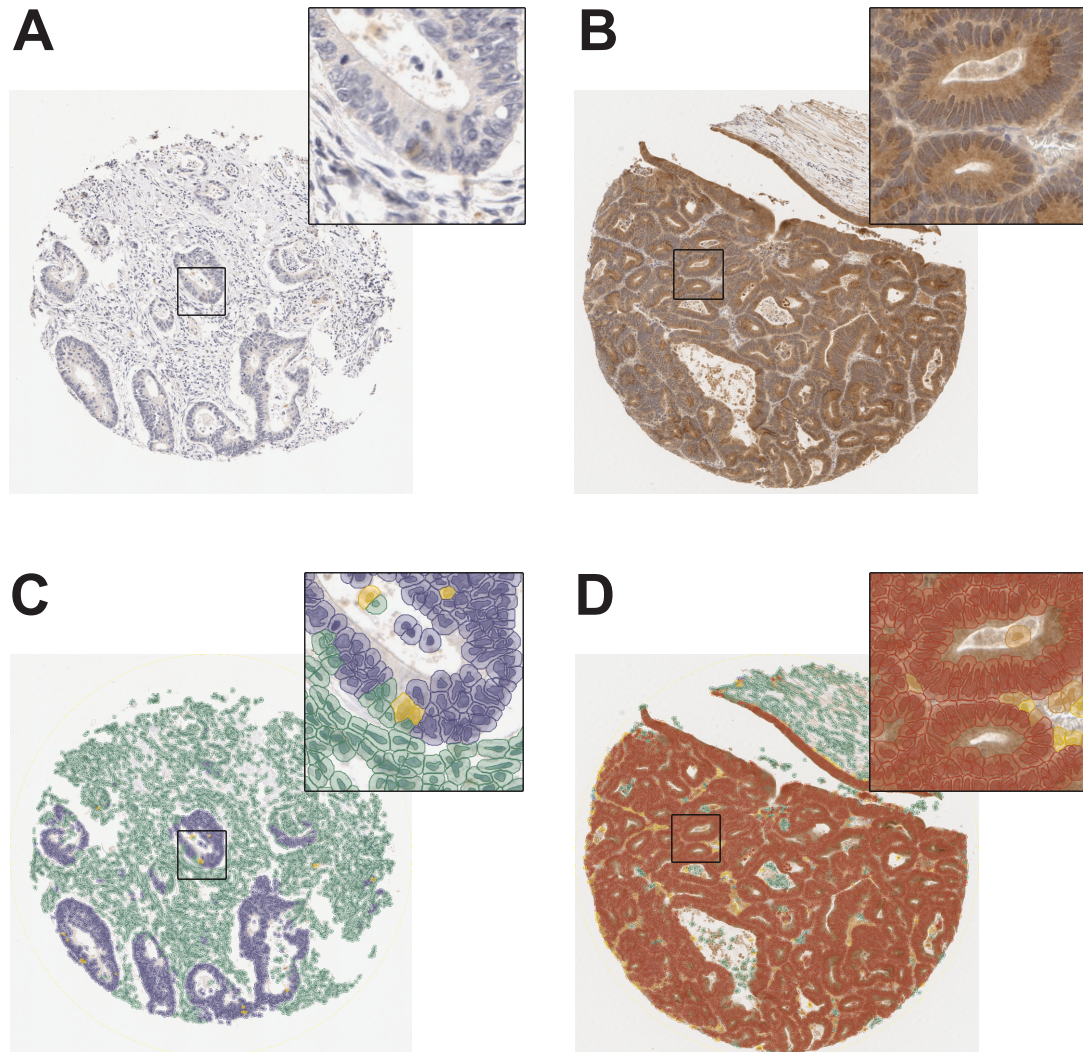

Detected cells are colour-coded according to their classification: green = non-tumour; blue = negatively staining tumour; yellow = weakly staining tumour; orange = moderately staining tumour; red = strongly staining tumour. (A) Original core from a tumour demonstrating HMGR immunorexpression less than the median value (HMGR-low). (B) Original core from a tumour demonstrating HMGR immunorexpression higher than the median value (HMGR-high). (C) QuPath cellular markup in the HMGR-low core. (D) QuPath cellular markup in the HMGR-high core.
