# Supplementary material for: Statin use, candidate mevalonate pathway biomarkers, and colon cancer survival in a population-based cohort study
Source: PubMed Central journal article supplement — Br J Cancer. 2017 May 18;116(12):1652–9. doi: 10.1038/bjc.2017.139 (PMC5518863; doi:10.1038/bjc.2017.139), 2017-05-18
Supplement: bjc2017139x3.pdf [file bjc2017139x3.pdf]

**Supplementary Table 1.** Representativeness of the socio-demographic, clinical, and pathological characteristics of patients within the remit of the Northern Ireland Biobank (NIB) compared to those outside NIB remit.

| Characteristic                            | All<br>(n=1,426)<br>No. (%) | Non-NIB remit<br>(n=686)<br>No. (%) | NIB remit<br>(n=740)<br>No. (%) | P<br>value* |
|-------------------------------------------|-----------------------------|-------------------------------------|---------------------------------|-------------|
| <i>Year of diagnosis</i>                  |                             |                                     |                                 |             |
| 2004                                      | 220 (15.4)                  | 99 (14.4)                           | 121 (16.4)                      |             |
| 2005                                      | 249 (17.5)                  | 94 (13.7)                           | 155 (21.0)                      |             |
| 2006                                      | 257 (18.0)                  | 121 (17.6)                          | 136 (18.4)                      |             |
| 2007                                      | 340 (23.8)                  | 186 (27.1)                          | 154 (20.8)                      |             |
| 2008                                      | 360 (25.3)                  | 186 (27.1)                          | 174 (23.5)                      | 0.001       |
| <i>Sex</i>                                |                             |                                     |                                 |             |
| Male                                      | 760 (53.3)                  | 362 (52.8)                          | 298 (53.8)                      |             |
| Female                                    | 666 (46.7)                  | 324 (47.2)                          | 342 (46.2)                      | 0.70        |
| <i>Age at diagnosis, years</i>            |                             |                                     |                                 |             |
| Mean (SD)                                 | 70.3 (11.7)                 | 70.3 (12.0)                         | 70.3 (11.5)                     | 0.99        |
| <i>Stage</i>                              |                             |                                     |                                 |             |
| II                                        | 812 (56.9)                  | 386 (56.3)                          | 426 (57.6)                      |             |
| III                                       | 614 (43.1)                  | 300 (43.7)                          | 314 (42.4)                      | 0.62        |
| <i>Income deprivation quintile**</i>      |                             |                                     |                                 |             |
| 1 (Most deprived)                         | 268 (18.8)                  | 126 (18.4)                          | 142 (19.2)                      |             |
| 2                                         | 291 (20.4)                  | 176 (25.7)                          | 115 (15.5)                      |             |
| 3                                         | 322 (22.6)                  | 179 (26.1)                          | 143 (19.3)                      |             |
| 4                                         | 274 (19.2)                  | 137 (20.0)                          | 137 (18.5)                      |             |
| 5 (Least deprived)                        | 256 (18.0)                  | 60 (8.8)                            | 196 (26.5)                      |             |
| Unknown                                   | 15 (1.1)                    | 8 (1.2)                             | 7 (1.0)                         | <0.001      |
| <i>Family history of CRC</i>              |                             |                                     |                                 |             |
| No                                        | 569 (39.9)                  | 198 (28.9)                          | 371 (50.1)                      |             |
| Yes                                       | 200 (14.0)                  | 95 (13.9)                           | 105 (14.2)                      |             |
| Unknown                                   | 657 (46.1)                  | 393 (57.3)                          | 264 (35.7)                      | <0.001      |
| <i>Adjuvant chemotherapy use</i>          |                             |                                     |                                 |             |
| No                                        | 961 (67.4)                  | 449 (65.5)                          | 512 (69.2)                      |             |
| Yes                                       | 465 (32.6)                  | 237 (34.5)                          | 228 (30.8)                      | 0.13        |
| <i>ECOG performance status</i>            |                             |                                     |                                 |             |
| 0-1                                       | 676 (47.4)                  | 298 (43.4)                          | 378 (51.1)                      |             |
| 2                                         | 104 (7.3)                   | 57 (8.3)                            | 47 (6.4)                        |             |
| 3-4                                       | 53 (3.7)                    | 20 (2.9)                            | 33 (4.5)                        |             |
| Unknown                                   | 593 (41.6)                  | 311 (45.3)                          | 282 (38.1)                      | 0.005       |
| <i>Deaths by 31<sup>st</sup> Dec 2013</i> |                             |                                     |                                 |             |
| No                                        | 777 (54.5)                  | 376 (54.8)                          | 401 (54.2)                      |             |
| Yes, all-cause                            | 649 (45.5)                  | 310 (45.2)                          | 339 (45.8)                      | 0.81        |
| Yes, colorectal-cancer specific           | 446 (31.3)                  | 209 (30.5)                          | 237 (32.0)                      | 0.77        |

Abbreviations: NIB – Northern Ireland Biobank; CRC – colorectal cancer; ECOG – Eastern Cooperative Oncology Group.

\*Chi-squared or t-tests comparing patients within NIB remit versus non-NIB remit patients.

\*\*Area-based measure of socio-economic status.
