# Supplementary material for: Statin use, candidate mevalonate pathway biomarkers, and colon cancer survival in a population-based cohort study
Source: PubMed Central journal article supplement — Br J Cancer. 2017 May 18;116(12):1652–9. doi: 10.1038/bjc.2017.139 (PMC5518863; doi:10.1038/bjc.2017.139), 2017-05-18
Supplement: bjc2017139x4.pdf [file bjc2017139x4.pdf]

**Supplementary Table 2.** Demographic and pathological characteristics according to availability of information on medication use.

| <b>Characteristic</b>    | <b>Statin status known (n=680)<br/>No. (%)</b> | <b>Statin status unknown (n=60)<br/>No. (%)</b> | <b>P value</b> |
|--------------------------|------------------------------------------------|-------------------------------------------------|----------------|
| <i>Age category</i>      |                                                |                                                 |                |
| <50                      | 47 (6.9)                                       | 0 (0)                                           | <0.001         |
| 50-<60                   | 71 (10.4)                                      | 4 (6.7)                                         |                |
| 60-<70                   | 197 (29.0)                                     | 8 (13.3)                                        |                |
| 70-<80                   | 239 (35.2)                                     | 23 (38.3)                                       |                |
| >80                      | 126 (18.5)                                     | 25 (41.7)                                       |                |
| <i>Gender</i>            |                                                |                                                 |                |
| Male                     | 370 (54.4)                                     | 28 (46.7)                                       | 0.25           |
| Female                   | 310 (45.6)                                     | 32 (53.3)                                       |                |
| <i>Year of diagnosis</i> |                                                |                                                 |                |
| 2004                     | 101 (14.9)                                     | 20 (33.3)                                       | <0.001         |
| 2005                     | 134 (19.7)                                     | 21 (35.0)                                       |                |
| 2006                     | 131 (19.3)                                     | 5 (8.3)                                         |                |
| 2007                     | 146 (21.5)                                     | 8 (13.3)                                        |                |
| 2008                     | 168 (24.7)                                     | 6 (10.0)                                        |                |
| <i>Stage</i>             |                                                |                                                 |                |
| II                       | 389 (57.2)                                     | 37 (61.7)                                       | 0.50           |
| III                      | 291 (42.8)                                     | 23 (38.3)                                       |                |
| <i>Grade</i>             |                                                |                                                 |                |
| Well-moderate            | 577 (84.9)                                     | 54 (90.0)                                       | 0.51           |
| Poor                     | 99 (14.6)                                      | 6 (10.0)                                        |                |
| Unknown                  | 4 (0.59)                                       | 0 (0.0)                                         |                |
| <i>MSI status</i>        |                                                |                                                 |                |
| Non MSI-high             | 437 (64.3)                                     | 34 (56.7)                                       | 0.50           |
| MSI-high                 | 123 (18.1)                                     | 13 (21.7)                                       |                |
| Unknown                  | 120 (17.7)                                     | 13 (21.7)                                       |                |

Abbreviations: MSI – microsatellite instability.
